# Supplementary material for: Mononuclear Tricoordinate Copper(I) and Silver(I) Halide Complexes of a Sterically Bulky Thiourea Ligand and a Computational Insight of Their Interaction with Human Insulin
Source: MDPI journal article supplement (doi:10.3390/molecules27134231), 2022-06-30
Supplement: s1 [file s1]

## Supporting Information

# Mononuclear Tricoordinate Copper(I) and Silver(I) Halide Complexes of a Sterically Bulky Thiourea Ligand and a Computational Insight of their Interaction with Human Insulin

Awal Noor <sup>1,\*</sup>, Sadaf Qayyum <sup>1</sup>, Farukh Jabeen <sup>2</sup> and Ashfaq Ur Rehman <sup>3</sup>

<sup>1</sup> Department of Basic Sciences, Preparatory Year Deanship, King Faisal University, Al-Hassa 31982, Saudi Arabia; sqayyum@kfu.edu.sa

<sup>2</sup> Department of Chemistry and Biochemistry, Laurentian University, 935 Ramsey Lake Road, Sudbury, ON P3E 2C6, Canada; fjabeen@laurentian.ca

<sup>3</sup> Department of Molecular Biology and Biochemistry, University of California, Irvine, CA 92697-3900, USA; aurehman@uci.edu

\* Correspondence: anoor@kfu.edu.sa

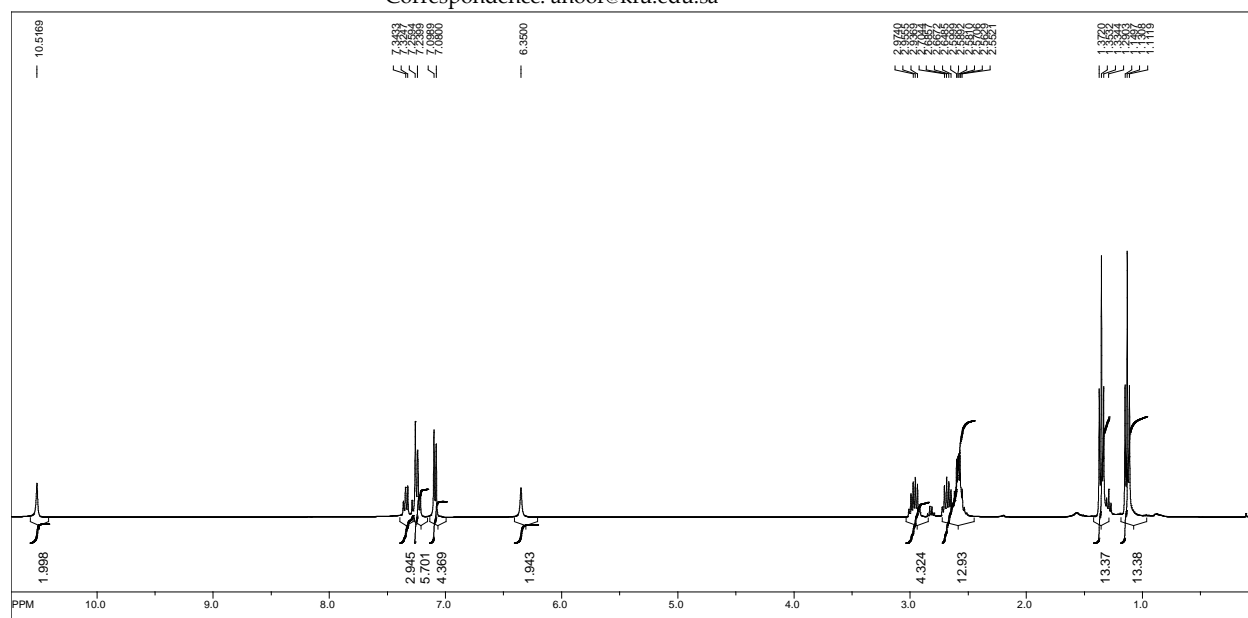

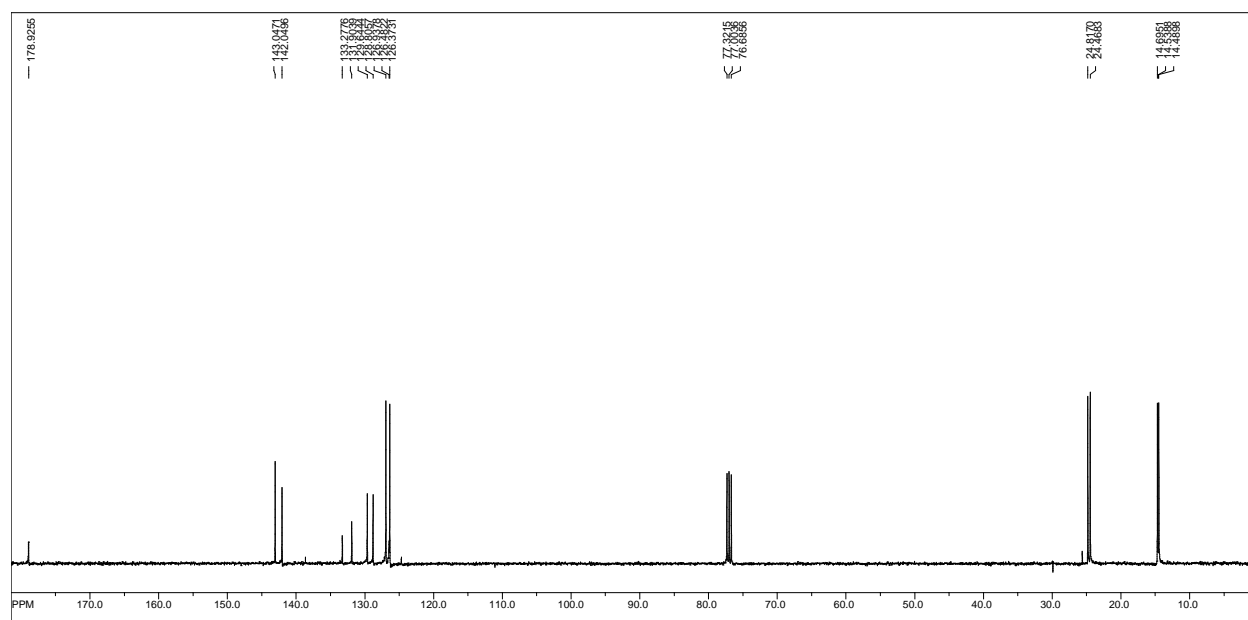

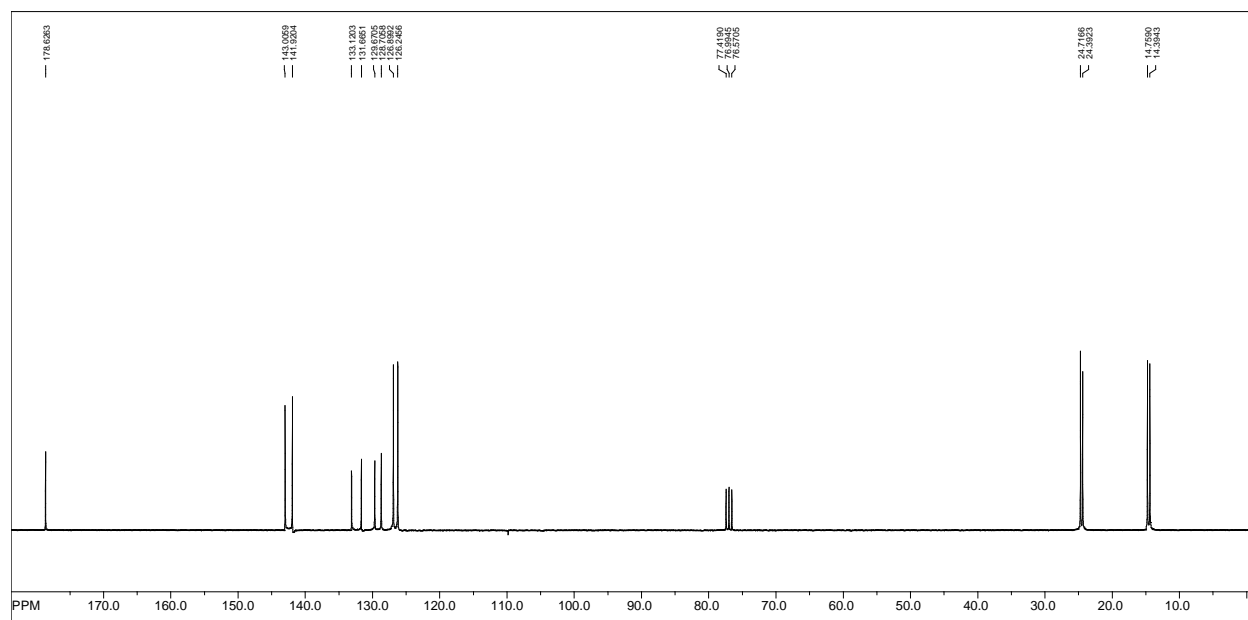

Figure S4. <sup>13</sup>C NMR spectrum of **1b**.

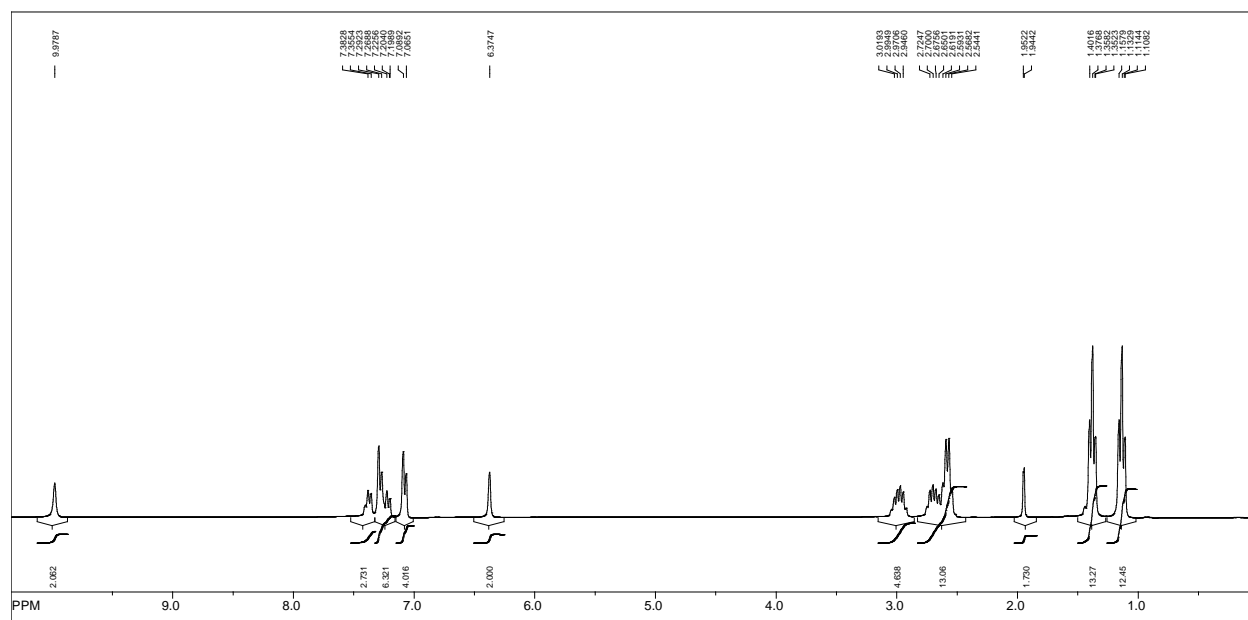

Figure S5. <sup>1</sup>H NMR spectrum of **1c**.

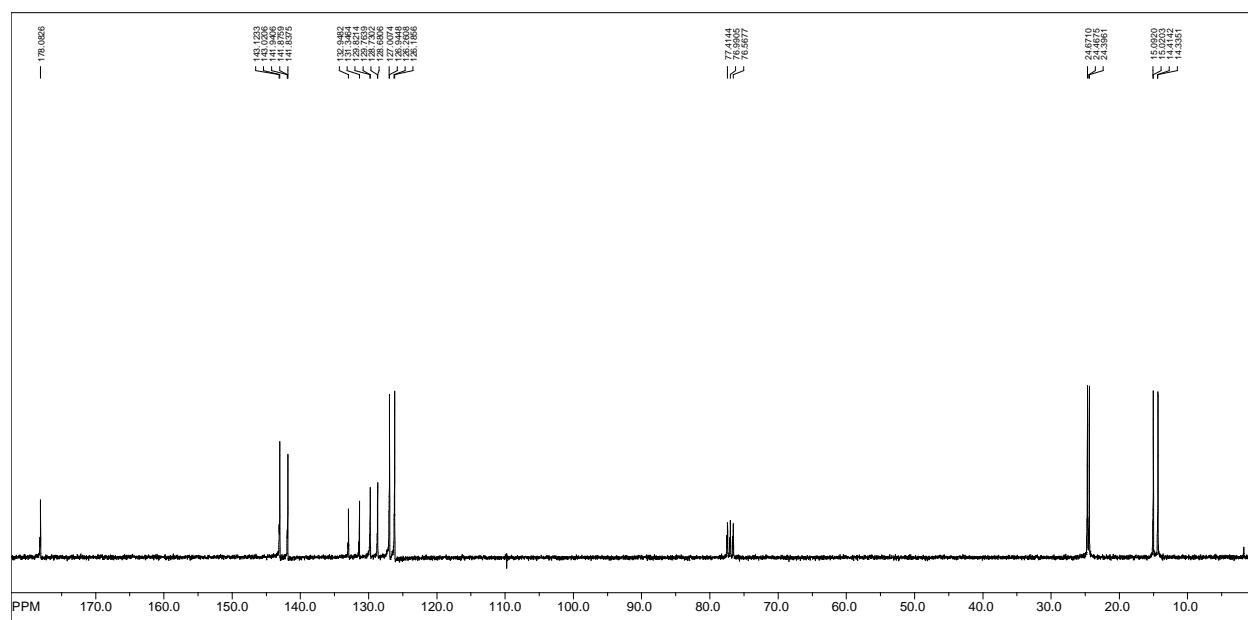

Figure S6. <sup>13</sup>C NMR spectrum of 1c.

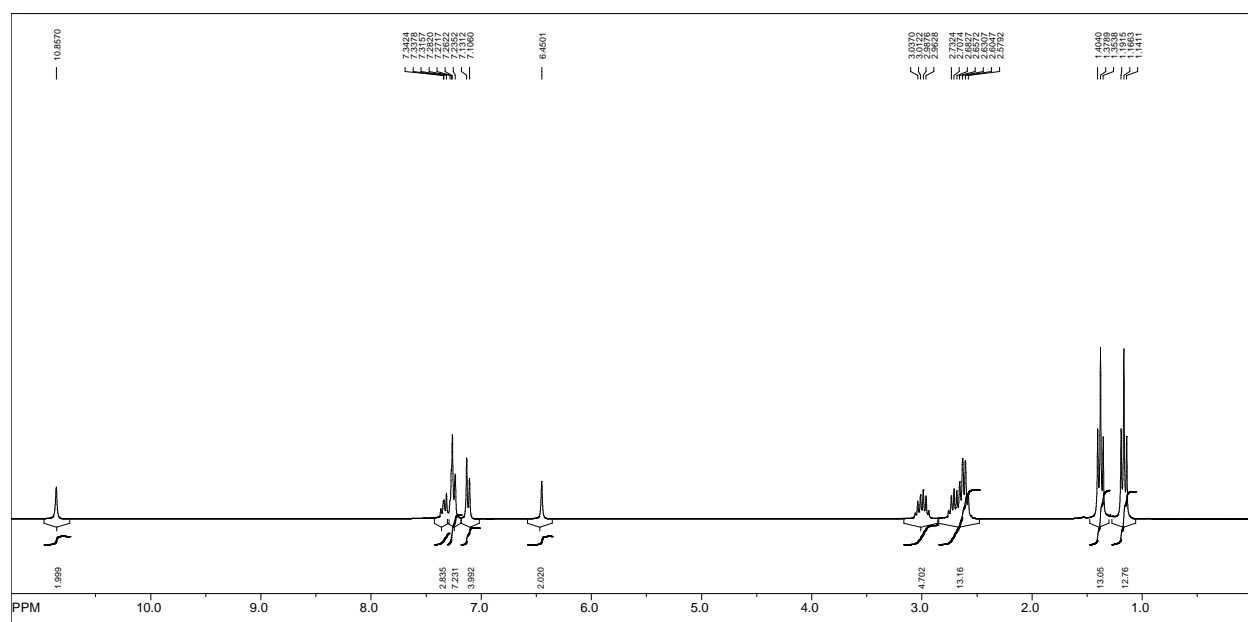

Figure S7. <sup>1</sup>H NMR spectrum of 2a.

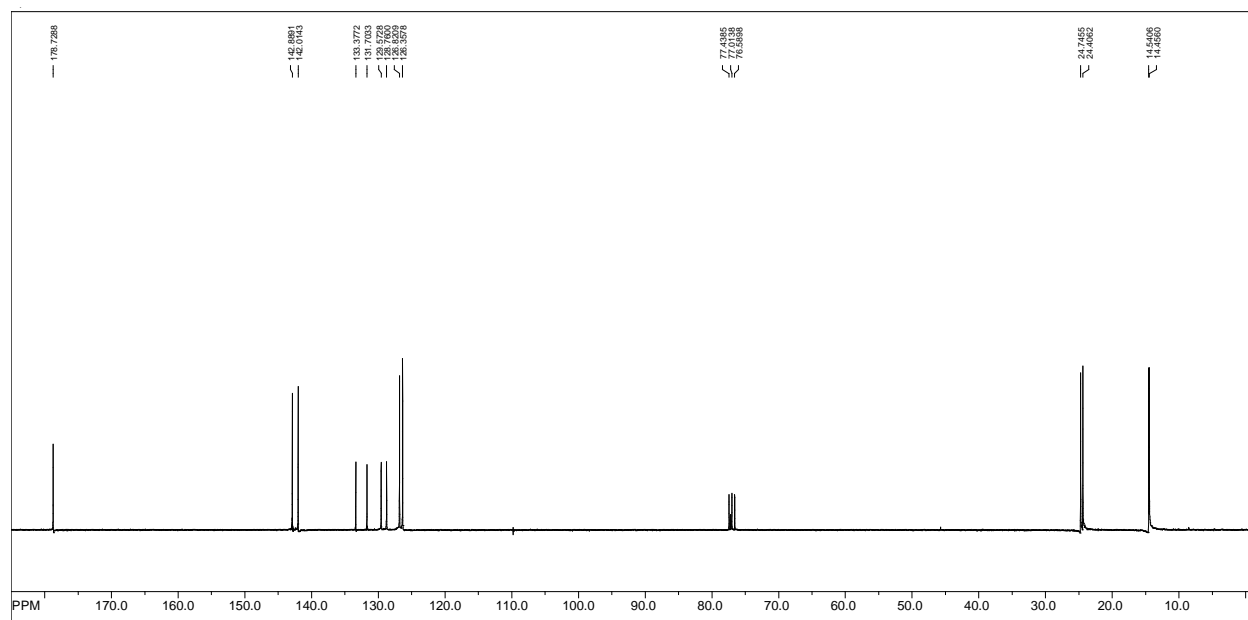

Figure S8. <sup>13</sup>C NMR spectrum of 2a.

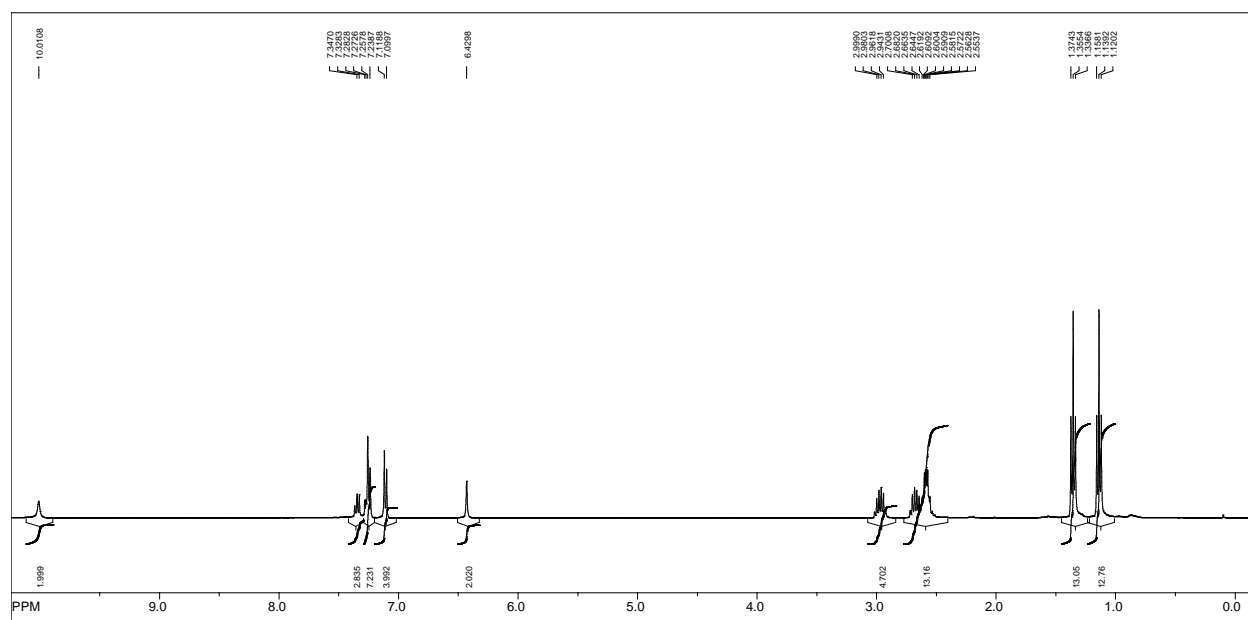

Figure S9. <sup>1</sup>H NMR spectrum of 2b.

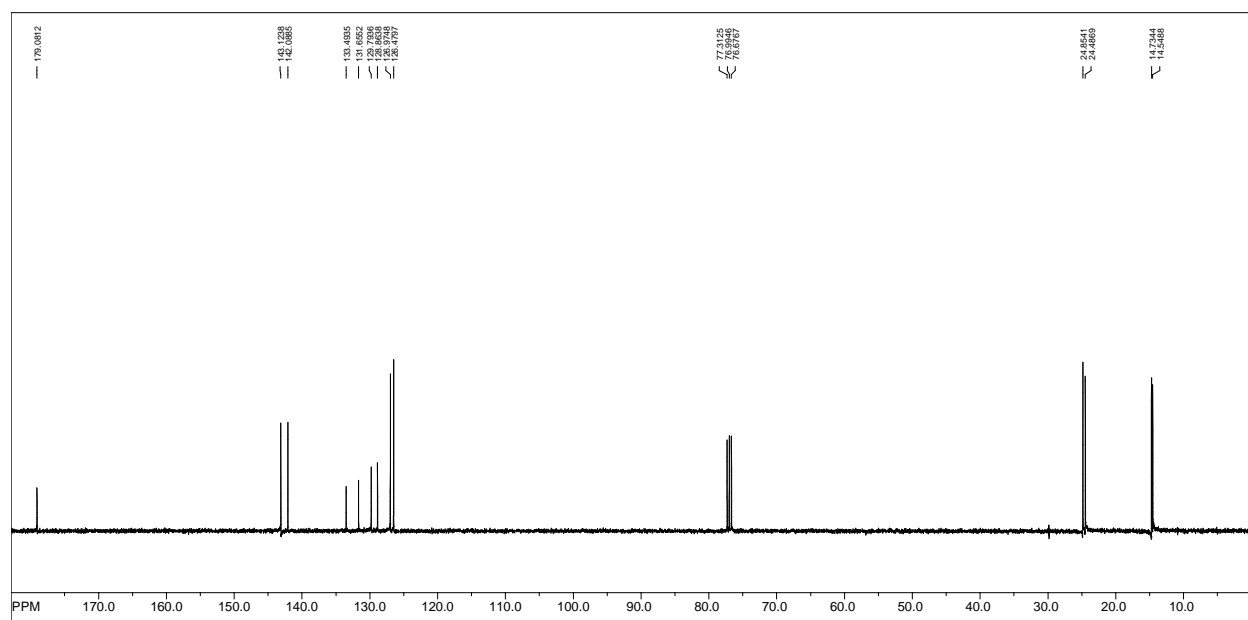

**Figure S10.** <sup>13</sup>C NMR spectrum of **2b**.

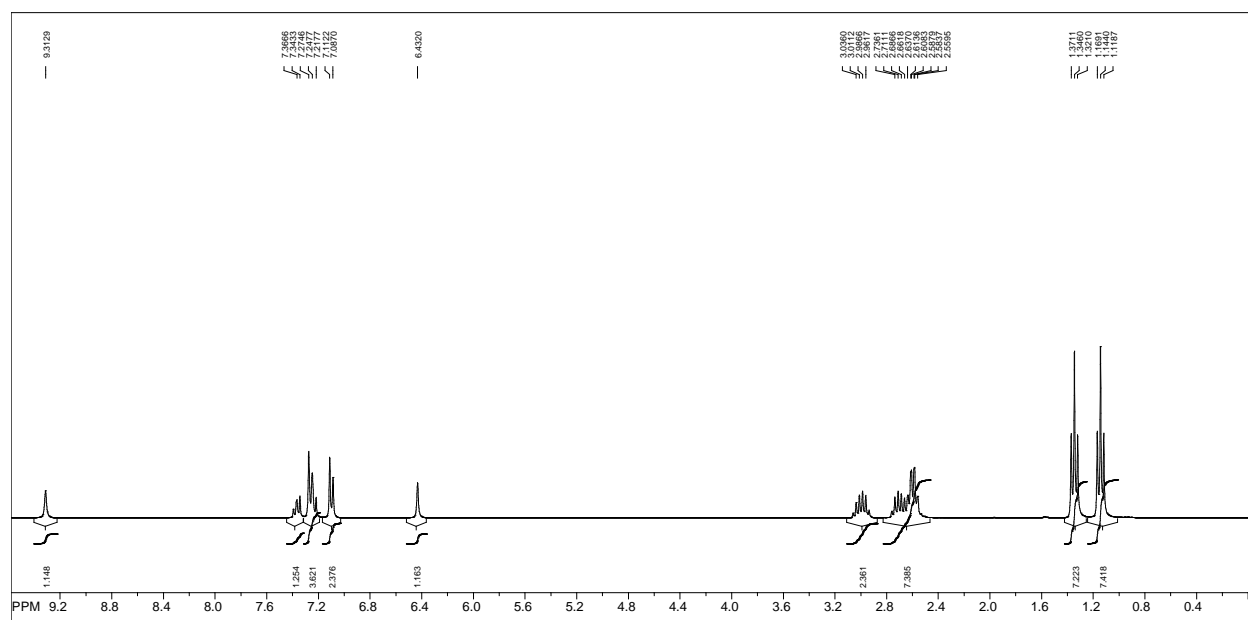

**Figure S11.** <sup>1</sup>H NMR spectrum of **2c**.

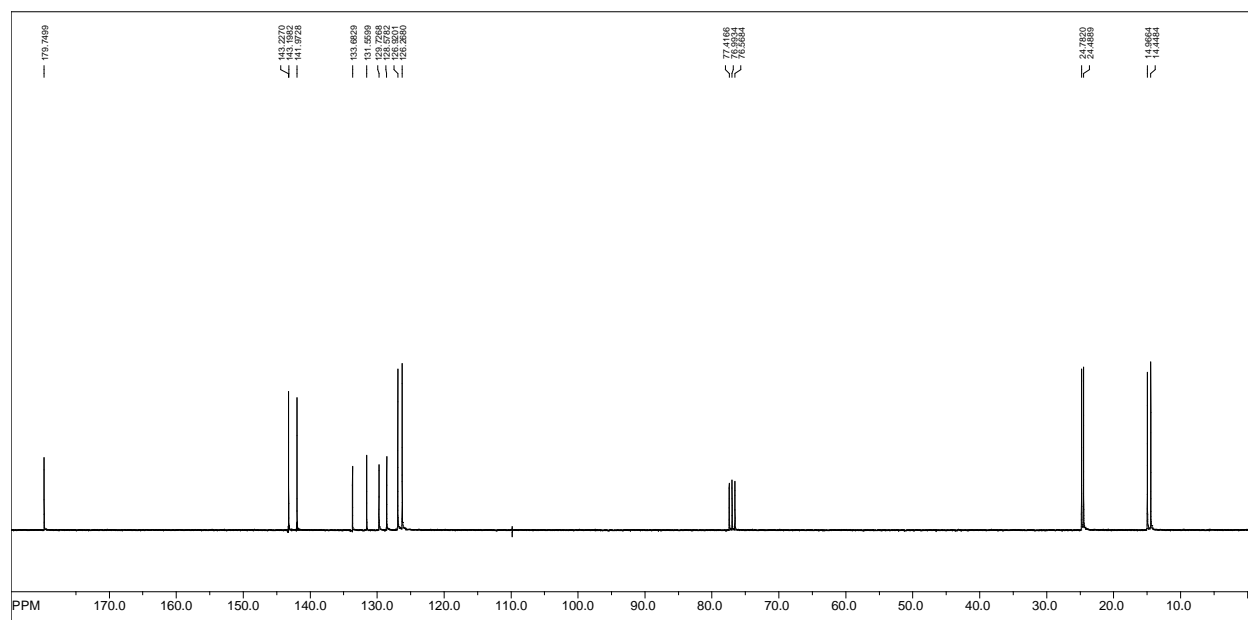

**Figure S12.** <sup>13</sup>C NMR spectrum of **2c**.
